# Supplementary material for: ML218 HCl Is More Efficient Than Capsaicin in Inhibiting Bacterial Antigen-Induced Cal 27 Oral Cancer Cell Proliferation
Source: MDPI journal article supplement (doi:10.3390/ijms222212559), 2021-11-22
Supplement: s1 [file s1]

## ML218 HCl is more efficient than Capsaicin in Bacterial Antigen induced Cal 27 oral cancer cell proliferation

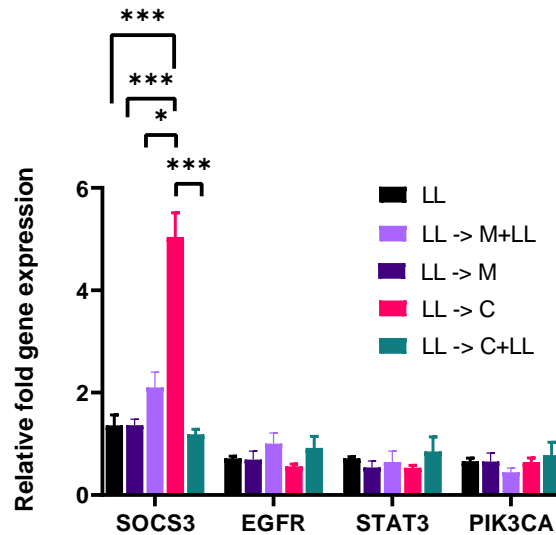

**Figure S1.** Expression of tumour suppressor and proliferation-related proteins by RT-qPCR analysis in Cal 27. All the gene expressions are relative to Cal 27 cells without bacterial antigen stimulation and ML218 HCl or capsaicin treatment. M: ML218 HCl, C: capsaicin, LL = LPS + LTA. Letter before the arrow represents pre-stimulation, e.g., LL-> M is LL pre-stimulation and then treatment with ML218 HCl. \*  $p \leq 0.05$ , \*\*\*  $p \leq 0.001$  is statistically significant.  $n = 9$  biological replicates. Error bars represent standard error of the mean.

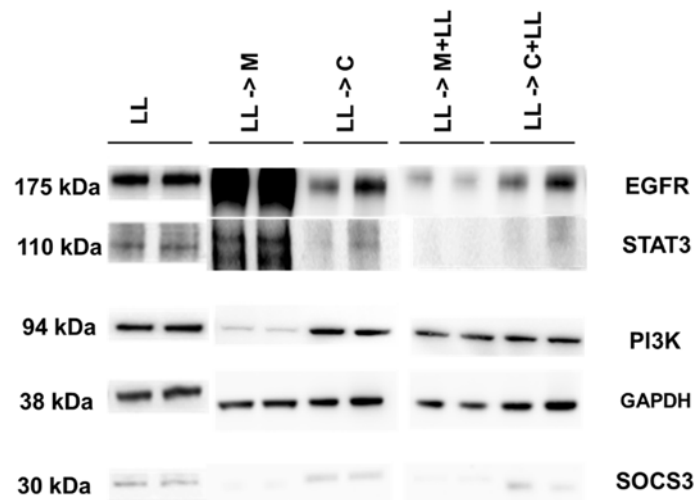

**Figure S2.** Western blot image of different tumour suppressor and proliferation related proteins in Cal 27. Cal 27 cells were stimulated with LPS + LTA (LL) for 72 h, and then treated with ML218 HCl or capsaicin for 24 h in the absence (LL -> M / LL -> C) or presence (LL -> M+LL / LL -> C+LL) of oral bacterial antigens. M = ML218 HCl, C = capsaicin, LL = LPS + LTA. Letter before arrow represents pre-stimulation e.g., LL -> M is LL pre-stimulation and then treatment with ML218 HCl.

Table S1: Detail of materials and reagents used in the study.

| Reagent/kit                                           | Manufacturer        | LOT     | Catalogue No. | Description                                                                                                                                                                                                |
|-------------------------------------------------------|---------------------|---------|---------------|------------------------------------------------------------------------------------------------------------------------------------------------------------------------------------------------------------|
| <b>Growth medium and buffers for the cell culture</b> |                     |         |               |                                                                                                                                                                                                            |
| Keratinocyte-Serum Free Medium (K-SFM)                | Life Technologies   | -       | 1700504       | Contains 2.5 µg human recombinant epithelial growth factor (EGF) (0.035 µg/µl), catalogue No. 10450-013, LOT 1969988 and 25 mg bovine pituitary extract (15.1 mg/ml), catalogue No. 13028-014, LOT 2014313 |
| Foetal bovine serum (FBS)                             | Life Technologies   | -       | 10099141      | Endotoxin level: ≤ 5 EU/ml.<br>Haemoglobin level: ≤ 30 mg/dL (levels routinely ≤ 25 mg/dL).                                                                                                                |
| 1X phosphate buffered saline (PBS)                    | Gibco               | -       | 20012-027     | 1.5 mM KH <sub>2</sub> PO <sub>4</sub> ; 155.2 mM Cl; 2.7 mM Na <sub>2</sub> HPO <sub>4</sub> ·7H <sub>2</sub> O (pH 7.2)                                                                                  |
| Trypsin-EDTA                                          | Sigma Life Sciences | T4049   | SLBZ7364      | 0.25%, bioreagent 2.5 gm porcine trypsin and 0.2 gm EDTA; 4 Na per litre of Hank's balanced salt solution with phenol red                                                                                  |
| Dulbeccos Modified Eagles Medium (DMEM)               | Gibco               | -       | 11960-044     | 4,500 mg/L glucose, sodium pyruvate and sodium bicarbonate                                                                                                                                                 |
| Penicillin–streptomycin (P/S) solution                | Life Technologies   | 2068825 | 15140-148     | 10,000 units/ml penicillin and 10,000 µg/ml streptomycin                                                                                                                                                   |

| Reagent/kit                                         | Manufacturer        | LOT       | Catalogue No. | Description                                                                                                                                                                                                                                        |
|-----------------------------------------------------|---------------------|-----------|---------------|----------------------------------------------------------------------------------------------------------------------------------------------------------------------------------------------------------------------------------------------------|
| Rosewell Park Memorial Institute (RPMI) 1640 medium | Gibco               | 1394048   | 21879-076     | Without L-glutamine, and HEPES, with phenol red. Contains biotin, vitamin B12, PABA, vitamin inositol and choline. Used sodium bicarbonate buffer (2.0 g/L), and therefore required 5–10% CO <sub>2</sub> environment to maintain physiological pH |
| <b>Freezing of the cells</b>                        |                     |           |               |                                                                                                                                                                                                                                                    |
| Tenak Slim tube cryogenic vials                     | Fisher Scientific   | 290992017 | TE78315       | RNAse–DNAse-free, 2-ml cryogenic vials                                                                                                                                                                                                             |
| Dimethyl sulfoxide (DMSO)                           | Sigma Life Sciences | RNBH8443  | D2650         | Organic solvent, (CH <sub>3</sub> ) <sub>2</sub> SO                                                                                                                                                                                                |
| <b>Drugs and bacterial antigens</b>                 |                     |           |               |                                                                                                                                                                                                                                                    |
| LPS 25 mg                                           | Sigma-Aldrich       | -         | L2630         | Lipopolysaccharides from <i>Escherichia coli</i> O111:B4, water soluble                                                                                                                                                                            |
| PHA 20 mg                                           | Sigma-Aldrich       | 37614100  | 11082132001   | Phytohemagglutinin-M (PHA-M) from <i>Phaseolus vulgaris</i> , water soluble                                                                                                                                                                        |
| LTA 5 mg                                            | Sigma-Aldrich       | 049M4155V | L3140         | Lipoteichoic acid from <i>Streptococcus pyogenes</i> , water soluble                                                                                                                                                                               |
| Capsazepine 5 mg                                    | Sigma-Aldrich       | 039K4615  | C191          | N-[2-(4-Chlorophenyl)ethyl]-1,3,4,5-tetrahydro-7,8-dihydroxy-2H-2-benzazepine-2-carbothioamide, polar compound soluble in organic solvent                                                                                                          |

| Reagent/kit                                | Manufacturer  | LOT        | Catalogue No. | Description                                                                                                                                                                                                                   |
|--------------------------------------------|---------------|------------|---------------|-------------------------------------------------------------------------------------------------------------------------------------------------------------------------------------------------------------------------------|
| ML218 HCl<br>(hydrochloride)<br>10 mg      | Tocris        | 1A/226248  | RDS450710     | 3,5-Dichloro-N-<br>[[[(1 $\alpha$ ,5 $\alpha$ ,6-exo,6 $\alpha$ )-<br>3-(3,3-<br>dimethylbutyl)-3-<br>azabicyclo [3.1.0]<br>hex-6-yl] methyl]-<br>benzamide<br>hydrochloride, polar<br>compound soluble in<br>organic solvent |
| Capsaicin 250 mg                           | Sigma-Aldrich | MKBV4243V  | 360376        | 8-Methyl-N-<br>vanillyl-trans-6-<br>nonenamide, polar<br>compound soluble in<br>organic solvent                                                                                                                               |
| CID16020046<br>5 mg                        | Sigma-Aldrich | 093M4730V  | SML0805       | 4-[4,6-Dihydro-4-(3-<br>hydroxyphenyl)-3-<br>(4-methylphenyl)-6-<br>oxopyrrolo[3,4-c]<br>pyrazol-5(1H)-yl]-<br>benzoic acid, polar<br>compound soluble in<br>organic solvent                                                  |
| Calcium chloride                           | Univar        | D3247      | 127/500 g     | CaCl <sub>2</sub> ·2H <sub>2</sub> O<br>supplied as white<br>powder. Water<br>soluble; pH 5%<br>solution at 25°C–<br>4.5–8.5                                                                                                  |
| <b>Proliferation assay</b>                 |               |            |               |                                                                                                                                                                                                                               |
| RealTime-Glo MT<br>Cell Viability<br>Assay | Promega       | 0000383765 | G9712         | 10 ×100 reactions                                                                                                                                                                                                             |
| MT Cell Viability<br>Substrate, 1000X      | Promega       | 0000362418 | G971A         | 10 $\mu$ l solution<br>supplied in opaque<br>tubes                                                                                                                                                                            |
| NanoLuc Enzyme,<br>1000X                   | Promega       | 0000362418 | E499A         | 0.4 mg/ml                                                                                                                                                                                                                     |
| Trypan blue stain<br>0.4%                  | Invitrogen    | 2117644    | T10282        | Trypan blue 0.4% to<br>identify dead cells<br>via colorimetric<br>detection; supplied<br>as 21 ml vials                                                                                                                       |
| Crystal violet<br>acetate                  | Sigma Aldrich | 69H3634    | C5042         | 9(amino-5-imino-<br>5H-benzo[a]<br>phenoxyazine<br>acetate salt supplied<br>as powder                                                                                                                                         |

| Reagent/kit                                      | Manufacturer             | LOT        | Catalogue No. | Description                                                                                                  |
|--------------------------------------------------|--------------------------|------------|---------------|--------------------------------------------------------------------------------------------------------------|
| Methanol                                         | Chem-Supply              | UN1230     | MA004-2.5L-P  | Analytical reagent                                                                                           |
| Cell Countess cell-counting chamber slides       | Invitrogen               | I31A9 Q422 | C10283        | For live cell and dead cell percentage via calorimetric detection                                            |
| <b>Protein estimation</b>                        |                          |            |               |                                                                                                              |
| Pierce BCA Protein Assay kit                     | Thermo Fisher Scientific | UD2969     | 23225         | Two-component, high-precision, detergent-compatible protein assay for determination of protein concentration |
| <b>Kinase profiling</b>                          |                          |            |               |                                                                                                              |
| Proteome Profiler Human Phospho-Kinase Array kit | R&D Systems              | P236166    | ARY003C       | 8 arrays (4 Part A, and 4 Part B), 1 transparency overlay, 1 8-well multi-dish and reagents                  |
| Human Phosphokinase array                        | R&D Systems              | 1569148    | 899190        | 8 nitrocellulose membranes (4 Part A, 4 Part B) each containing antibodies printed in duplicate              |
| Array Buffer 1                                   | R&D Systems              | P173293    | 895477        | 21 ml of buffered protein base with preservatives                                                            |
| Array Buffer 2 5X Concentrate                    | R&D Systems              | P200594    | 895478        | 21 ml of concentrated buffered protein base with preservatives                                               |
| Array Buffer 3                                   | R&D Systems              | P184800    | 895008        | 21 ml of buffered protein base with preservatives                                                            |
| Wash Buffer Concentrate                          | R&D Systems              | P230760    | 895003        | 2 vials (21 ml/vial) of a 25-fold concentrated solution of buffered surfactant with preservative             |
| Detection Antibody Cocktail A                    | R&D Systems              | 1568310    | 899188        | 1 vial of biotinylated antibody cocktail; lyophilised                                                        |

| Reagent/kit                                                   | Manufacturer                          | LOT      | Catalogue No. | Description                                                       |
|---------------------------------------------------------------|---------------------------------------|----------|---------------|-------------------------------------------------------------------|
| Detection Antibody Cocktail B                                 | R&D Systems                           | 1568313  | 899189        | 1 vial of biotinylated antibody cocktail; lyophilised             |
| Streptavidin-HRP                                              | R&D Systems                           | 1549191  | 893019        | 200 µl of streptavidin conjugated to horseradish peroxidase (HRP) |
| Chemi Reagent 1                                               | R&D Systems                           | P222081  | 894287        | 2.5 ml of stabilised hydrogen peroxide with preservative          |
| Chemi Reagent 2                                               | R&D Systems                           | P222083  | 894288        | 2.5 ml of stabilised luminol with preservative                    |
| 8-well multi-dish                                             | R&D Systems                           | -        | 607591        | Clear 8-well rectangular multi-dish                               |
| Transparency overlay template                                 | R&D Systems                           | -        | 608281        | 1 transparency overlay template for coordinate reference          |
| <b>Determination of proliferation related gene expression</b> |                                       |          |               |                                                                   |
| Pure Link RNA mini kit                                        | Invitrogen                            | 2137737  | 12183018A     | Total RNA extraction                                              |
| Trizol reagent                                                | Invitrogen                            | 260702   | 15596026      | Total RNA extraction                                              |
| Ethyl alcohol                                                 | Sigma Aldrich                         | SHBH7551 | E7023-1L      | CH <sub>3</sub> CH <sub>2</sub> OH; pure                          |
| SSIV VILO Master mix W/ EzDNASE                               | Invitrogen                            | 00831746 | 11766050      | DNA digestion and Reverse transcription PCR                       |
| POWRUP SYBR Master Mix, 5 ml                                  | Invitrogen                            | 00799448 | A25742        | Real-time PCR Master Mix                                          |
| Chloroform                                                    | BDH AnalaR                            | 19073    | VWRC22711.260 | CHCl <sub>3</sub> , contains 1% v/v of ethanol as preservative    |
| MicroAmp Fast plate                                           | Applied Biosciences, Life Biosystems  | -        | 4346907       | 96-well reaction plate (0.1 ml)                                   |
| Optical adhesive cover                                        | Applied Biosystems, Life Technologies | -        | 4360954       | qPCR-compatible optical adhesive covers                           |
| <b>Western blot</b>                                           |                                       |          |               |                                                                   |

| Reagent/kit                                           | Manufacturer      | LOT                    | Catalogue No. | Description                                                                         |
|-------------------------------------------------------|-------------------|------------------------|---------------|-------------------------------------------------------------------------------------|
| Human/Mouse SOCS-3 MAb (Clone 516919), 25 µg          | R&D Systems       | CCDL0219051            | MAB5696       | Purified mouse monoclonal IgG                                                       |
| Human/Mouse/Rat STAT3 MAb (Clone 232209), 25 µg       | R&D Systems       | JXW041912A             | MAB1799       | Purified mouse monoclonal IgG                                                       |
| Human PI 3-Kinase p110 beta MAb (Clone 269020), 25 µg | R&D Systems       | VCK042001A             | MAB2686       | Purified mouse monoclonal IgG                                                       |
| Anti-G3PDH/GAPDH (T0893), 20 µL                       | R&D Systems       | 20481                  | 2275-PC-020   | Polyclonal rabbit antibody                                                          |
| Human EGF R/ErbB1 Polyclonal Ab, 25 µg                | R&D Systems       | AUC1118111             | AF231         | Affinity purified goat IgG                                                          |
| Novex Sharp pre-stained protein standard              | Life Technologies | 2115579                | LC5800        | consists of 12 pre-stained protein bands in molecular weight range 3.5–260 kDa      |
| Clarity Western ECL Substrate                         | Bio-Rad           | 102031366<br>102031363 | 1705060       | Supplied in two parts: peroxide solution and luminol/enhancer solution              |
| Ponceau S solution                                    | Sigma-Aldrich     | SLCB3855               | P7170-1L      | Bioreagent 0.1% (w/v) supplied in 5% acetic acid:<br>$C_{22}H_{12}N_4Na_4O_{13}S_4$ |
| Anti-goat IgG HRP conjugate                           | R&D Systems       | XGD10161011            | HAF009        | Secondary antibody specific to primary antibody source                              |
| Anti-rabbit IgG HRP conjugate                         | R&D Systems       | FIN1819021             | HAF008        | Secondary antibody specific to primary antibody source                              |
| Anti-mouse IgG HRP conjugate                          | R&D Systems       | WVA00919011            | HAF018        | Secondary antibody specific to primary antibody source                              |

| Reagent/kit                                            | Manufacturer | LOT        | Catalogue No. | Description                                                                                                                                                                                |
|--------------------------------------------------------|--------------|------------|---------------|--------------------------------------------------------------------------------------------------------------------------------------------------------------------------------------------|
| NuPAGE LDS sample buffer (4X)                          | Invitrogen   | 1981103    | NP0007        | Used to prepare protein samples for denaturing gel electrophoresis with Bis-Tris or Tris-Acetate gels. It contains lithium dodecyl sulfate, pH 8.4; contains Coomassie G250 and Phenol Red |
| NuPAGE 10% bis-tris gel                                | Invitrogen   | 19050170   | NP0302BOX     | 1 mm × 12 well                                                                                                                                                                             |
| NuPAGE 10% bis-tris gel                                | Invitrogen   | 19071070   | NP0301BOX     | 1 mm × 10 well                                                                                                                                                                             |
| 20X NuPAGE MOPS SDS Running Buffer                     | Invitrogen   | -          | NP0001        | 500 ml contains 50 mM MOPS, 50 mM Tris Base, 0.1% SDS, 1 mM EDTA, pH 7.7                                                                                                                   |
| <b>Apoptotic assay</b>                                 |              |            |               |                                                                                                                                                                                            |
| CellEvent Caspase-3/7 Green Detection Reagent 25 µl    | Invitrogen   | 2119122    | C10723        | 2.0 mM solution in DMSO                                                                                                                                                                    |
| <b>TNF α enzyme-linked immunosorbent assay (ELISA)</b> |              |            |               |                                                                                                                                                                                            |
| Human TNF α ELISA kit                                  | Invitrogen   | 225688-001 | KHC3011       | Supplied with all the reagents                                                                                                                                                             |

Table S2: Primers used in RT-qPCR for proliferation factors.

| Gene Name     | Accession Number | Sequence (5'-3')      | Position | Exon – Exon | PCR product length (bp) |
|---------------|------------------|-----------------------|----------|-------------|-------------------------|
| <i>SOCS3</i>  | NM_003955.4      | GCGCGAAGGCTCCTTTGTG   | 191      | 330/331     | 135                     |
|               |                  | GGGGGGCTGGTCCCGAATC   | 336      |             |                         |
| <i>STAT3</i>  | NM_139276.2      | GGACATCAGCGGTAAGACCC  | 2118     | 2128/2129   | 168                     |
|               |                  | CTCTGGCCGACAATACTTTC  | 2310     |             |                         |
| <i>EGFR</i>   | NM_005228.5      | AGCTACGGGGTGACTGTTTG  | 2956     | 2962/2963   | 106                     |
|               |                  | GAACTTTGGGCGACTATCTG  | 3114     |             |                         |
| <i>GAPDH</i>  | NM_002046.7      | GACAGTCAGCCGCATCTTCT  | 21       | 105/106     | 181                     |
|               |                  | ACCAAATCCGTTGACTCCGA  | 112      |             |                         |
| <i>PI3KCA</i> | NM_006214.4      | TGG GGATGATTTACGGCAAG | 2732     | 2739/2740   | 129                     |
|               |                  | TCCACACAGTCACCGATTGA  | 2861     |             |                         |
